# Supplementary material for: Impact of climate change on the production and transport of sea salt aerosol on European seas
Source: Copernicus journal article supplement (doi:10.5194/acp-2015-1056), 2016-02-16
Supplement: Supplementary file 1 [file acp-2015-1056-supplement.pdf]

# 1 Supplements

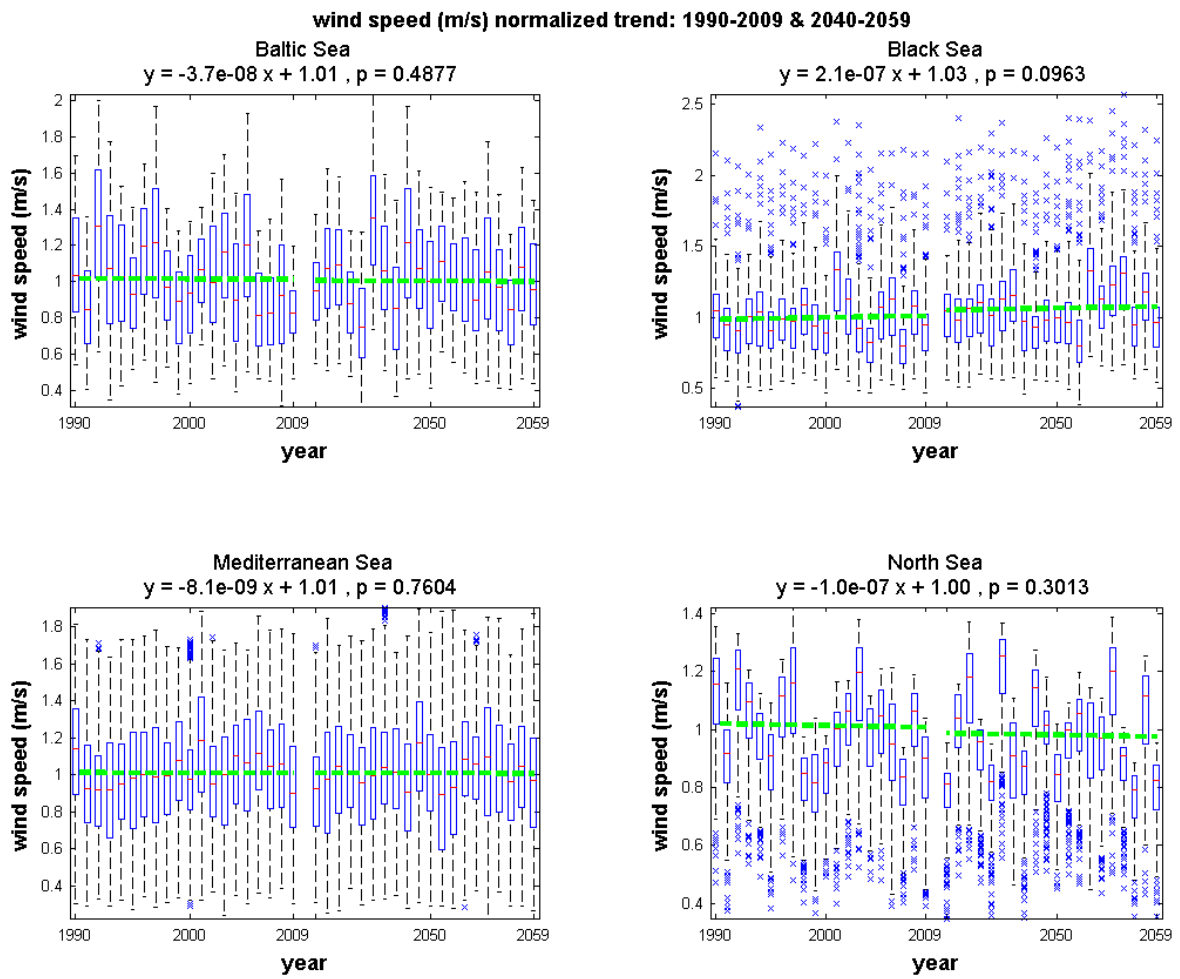

2

3

4 **Figure S1** Annual mean win speed ( $m s^{-1}$ ) normalized trend ( $y$ ) over the past and future  
5 periods ( $x$  [year]), over the Baltic, Black, North and Mediterranean Seas. Only sea cells  
6 considered.

7

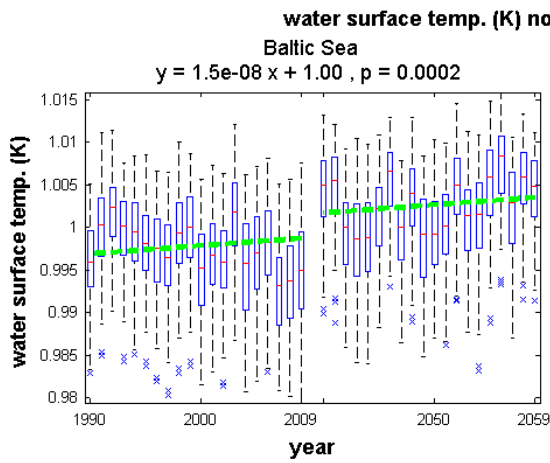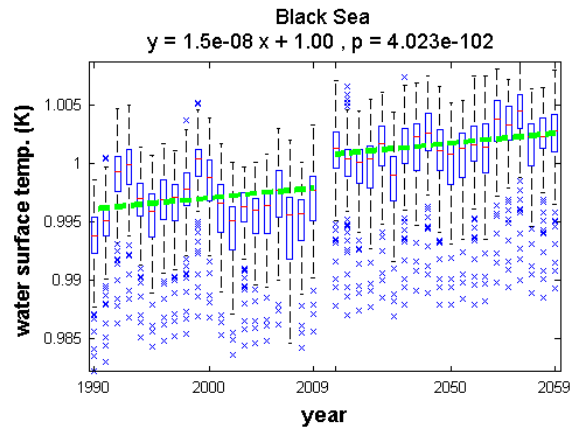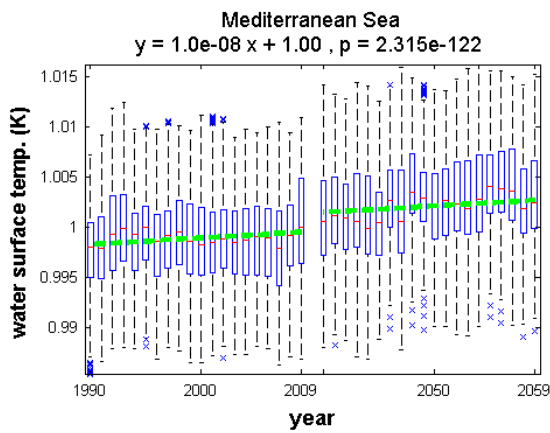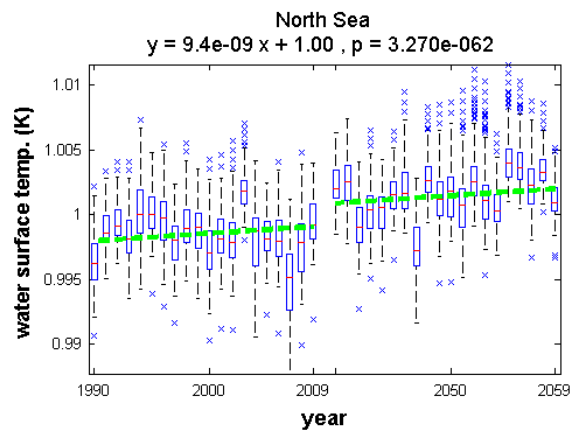

1  
2  
3  
4  
5

**Figure S2** Annual mean water surface temperature (K) normalized trend ( $y$ ) over the past and future periods ( $x$  [year]), over the Baltic, Black, North and Mediterranean Seas. Only sea cells considered.

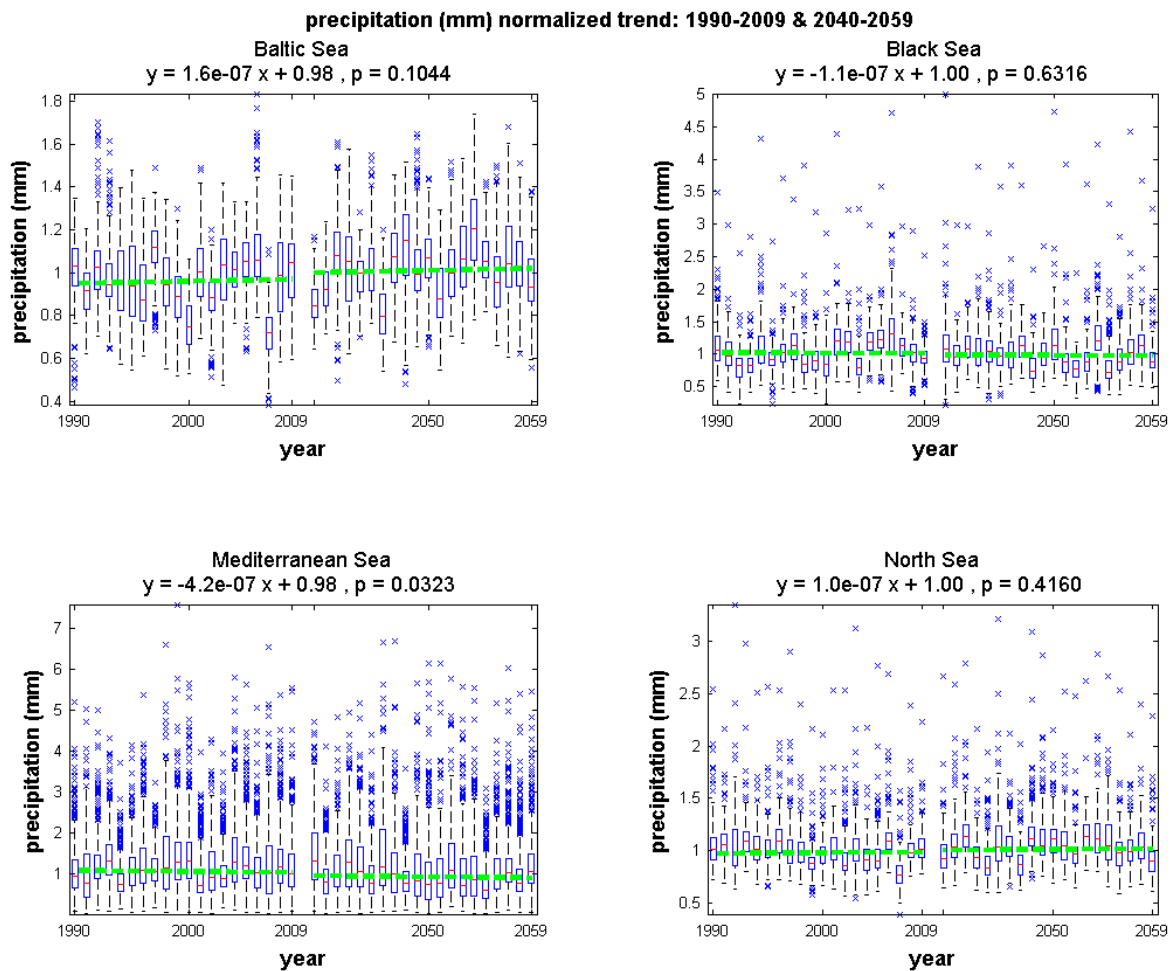

1

2

3 **Figure S3** Annual precipitation (mm) normalized trend (y) over the past and future periods (x  
 4 [year]), over the Baltic, Black, North and Mediterranean Seas. Only sea cells considered.

5

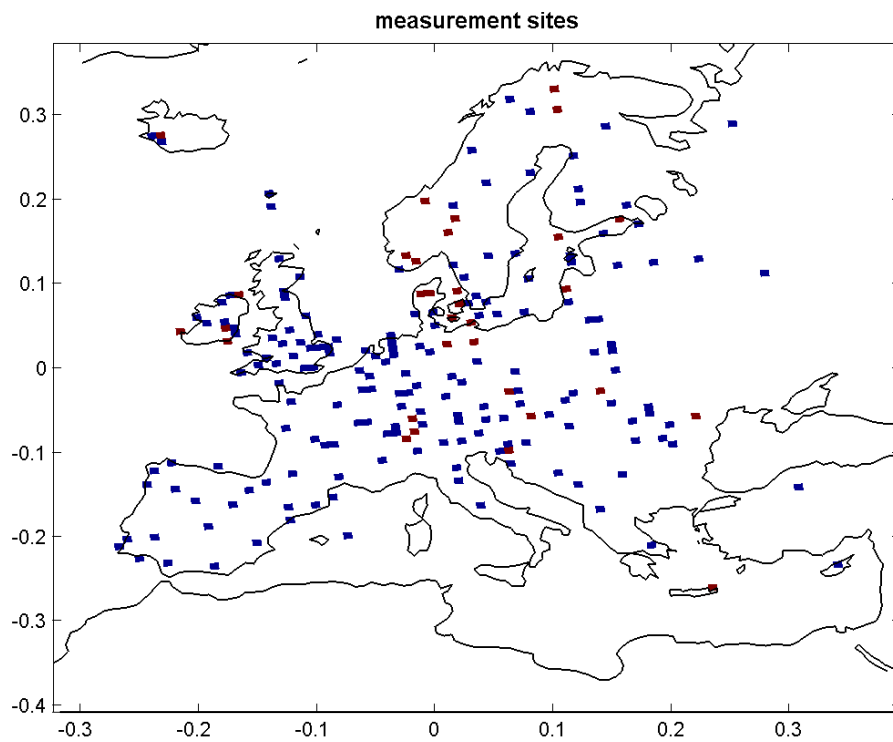

1  
2  
3  
4  
5

**Figure S4** Location of the EMEP measurement sites measuring concentration and wet deposition of  $\text{Na}^+$ . The ones measuring both quantities are marked in red.

1

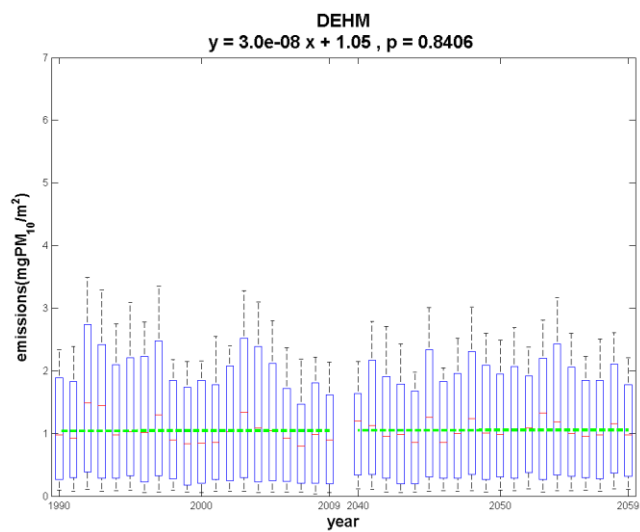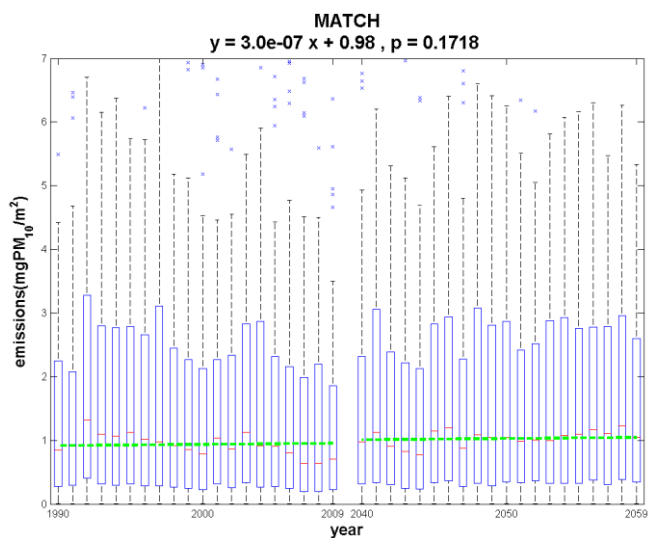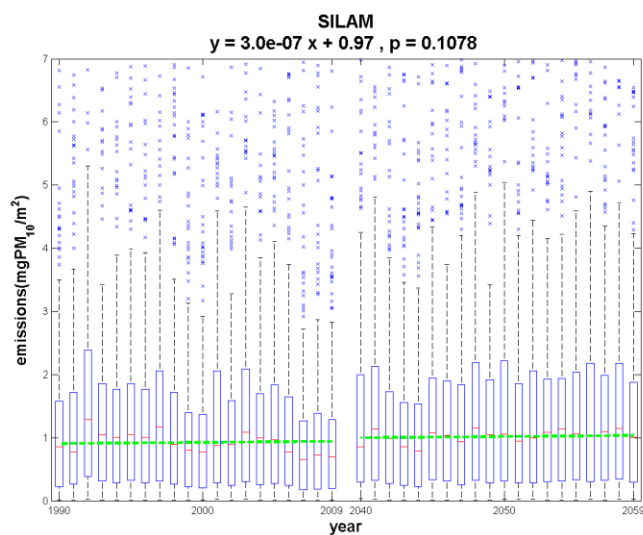

2 **Figure S5** Baltic Sea SSA annual emission ( $\text{mgPM}_{10} \text{ m}^{-2}$ ) normalized trend ( $y$ ) over the past  
3 and future periods ( $x$  [year]).

4

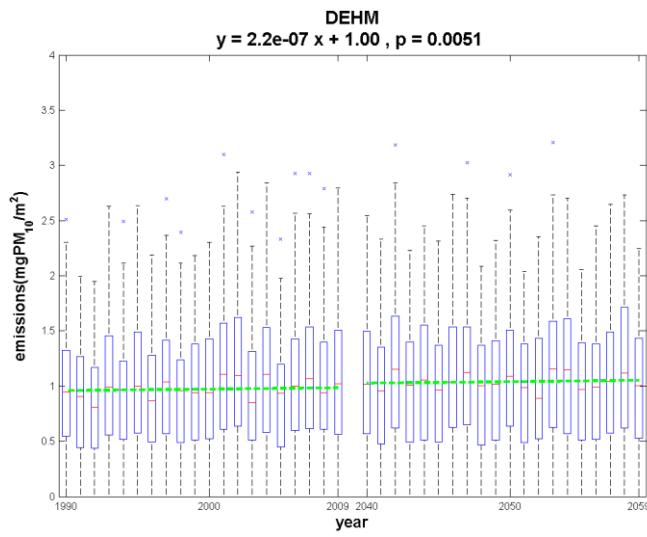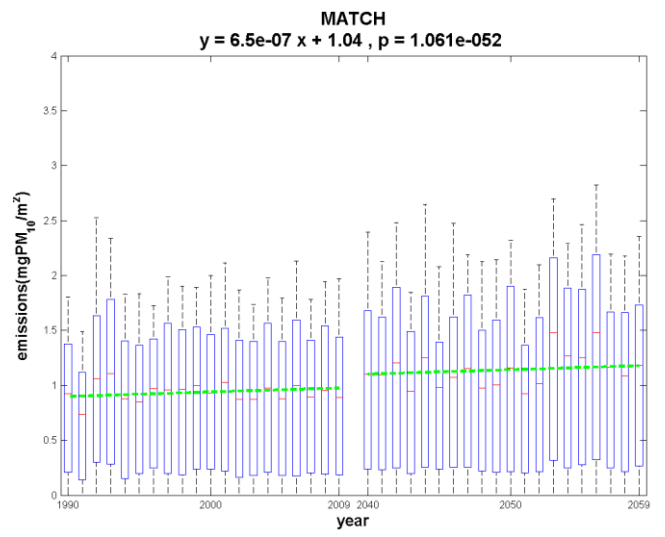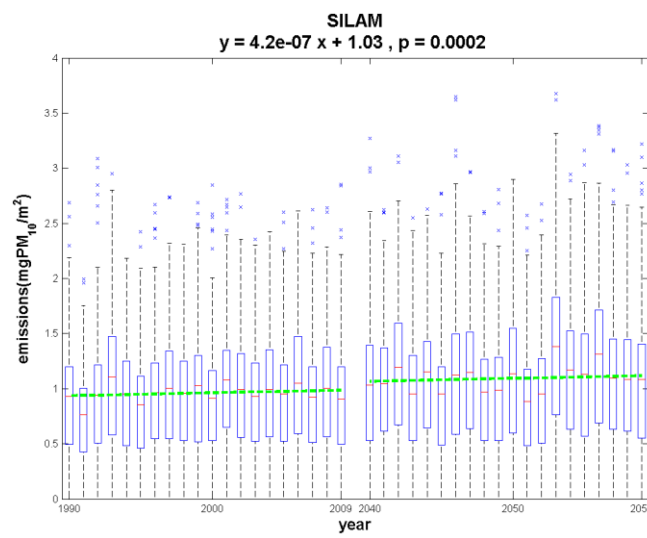

1

2 **Figure S6** Black Sea SSA annual emission ( $\text{mgPM}_{10} \text{ m}^{-2}$ ) normalized trend ( $y$ ) over the past  
 3 and future periods ( $x$  [year]).

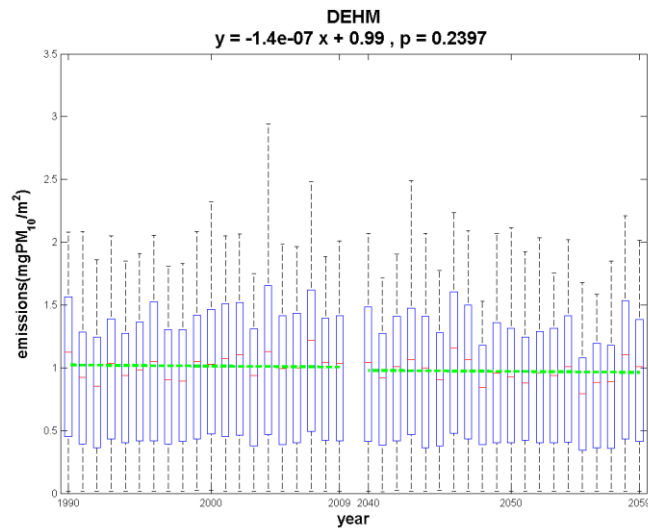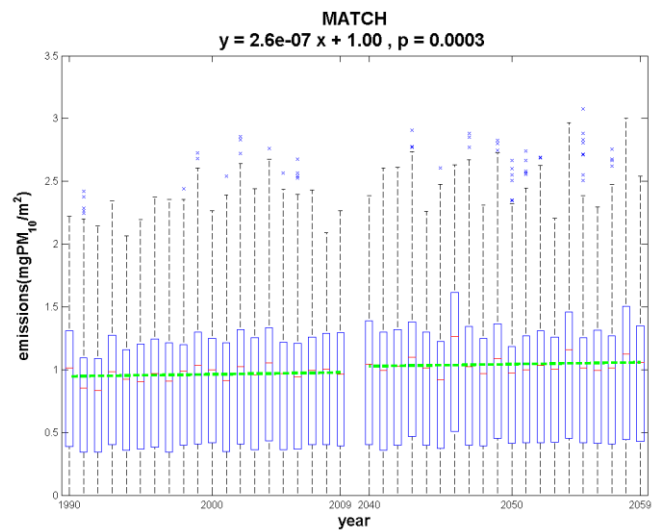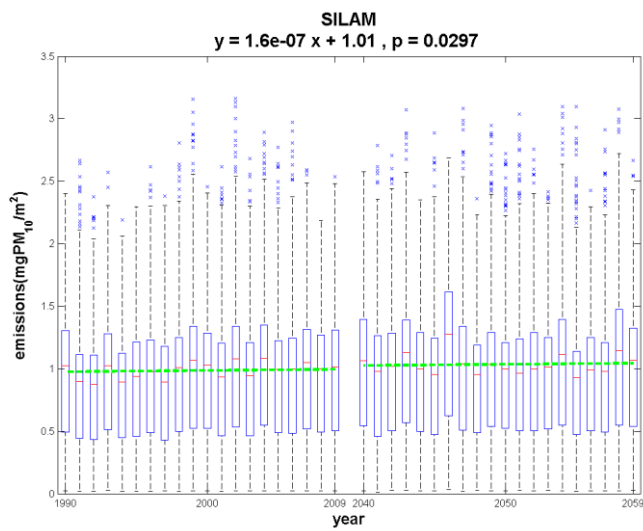

1  
 2 **Figure S7** Mediterranean Sea SSA annual emission ( $\text{mgPM}_{10} \text{ m}^{-2}$ ) normalized trend ( $y$ ) over  
 3 the past and future periods ( $x$  [year]).

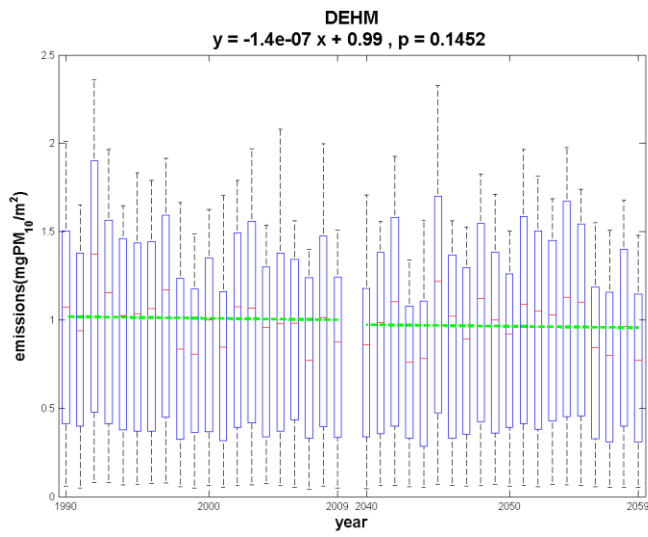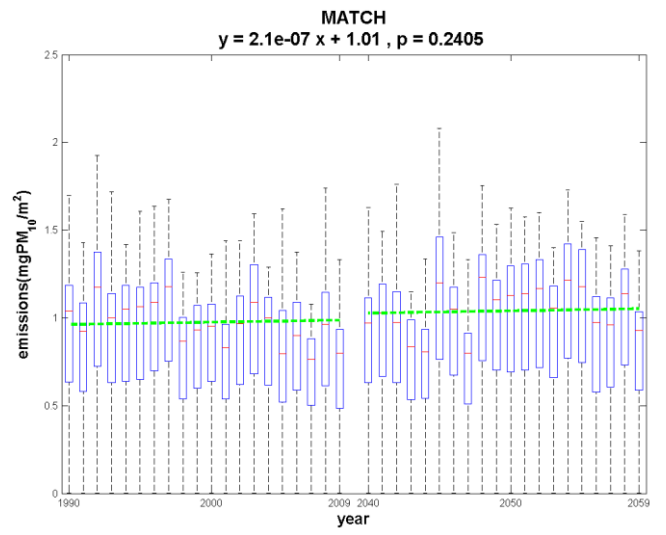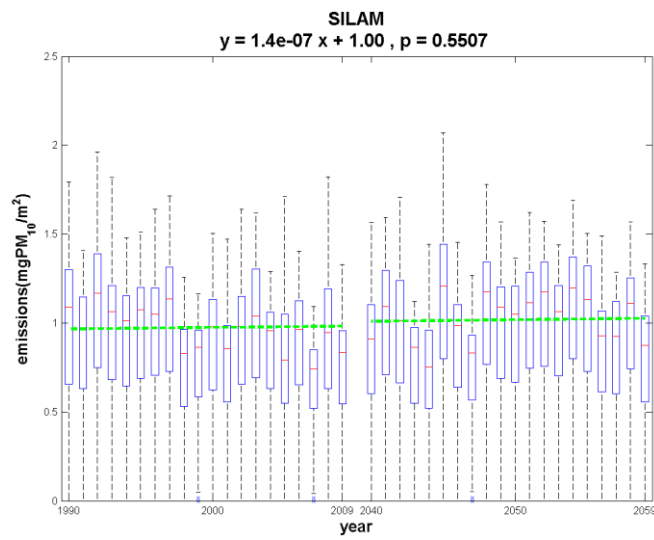

1

2 **Figure S8** North Sea SSA annual emission ( $\text{mgPM}_{10} \text{ m}^{-2}$ ) normalized trend ( $y$ ) over the past  
 3 and future periods ( $x$  [year]).

4

5



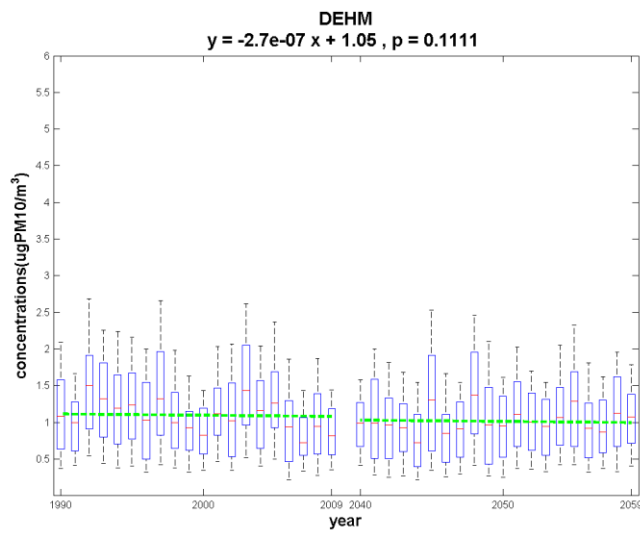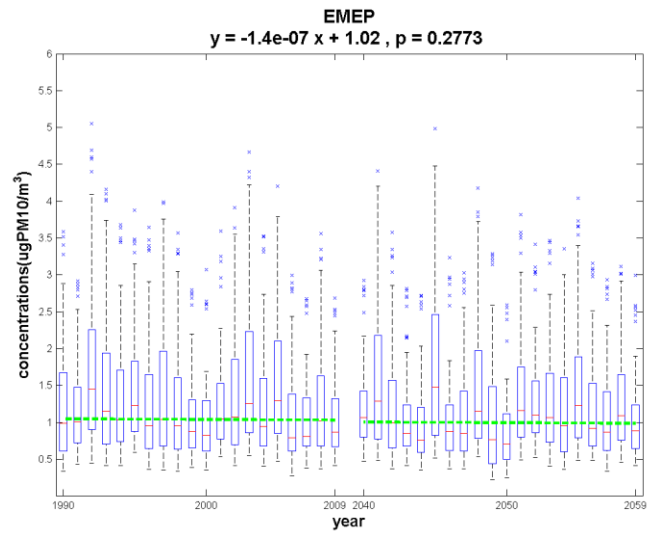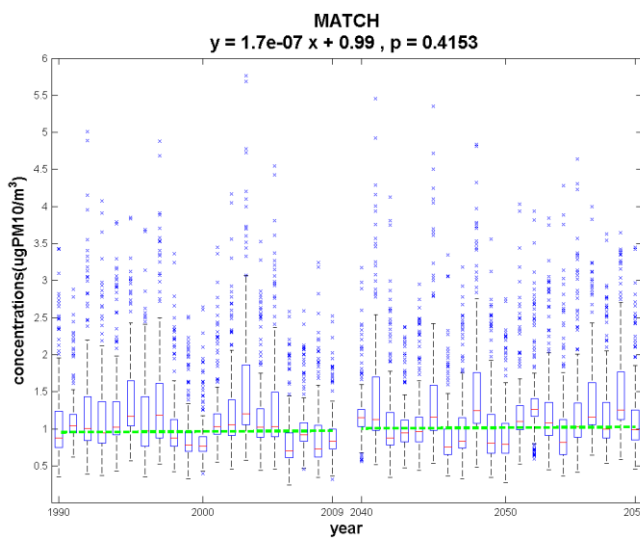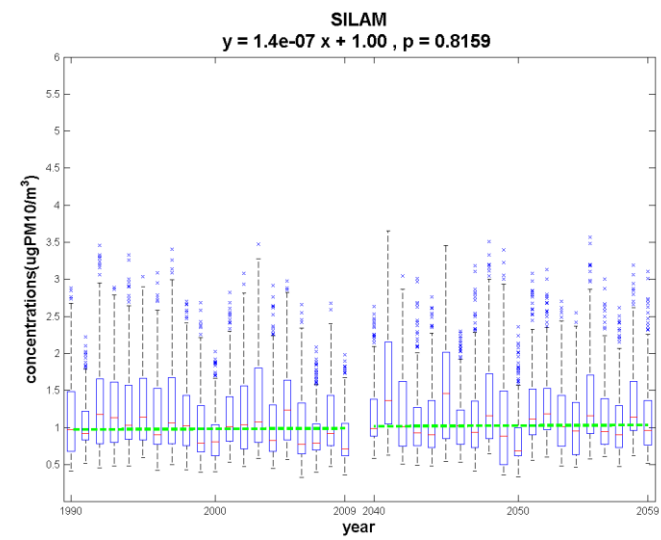

1 **Figure S9** Baltic Sea SSA mean concentration ( $\mu\text{gPM}_{10} \text{m}^{-3}$ ) normalized trend ( $y$ ) over the  
 2 past and future periods ( $x$  [year]).

3  
 4  
 5

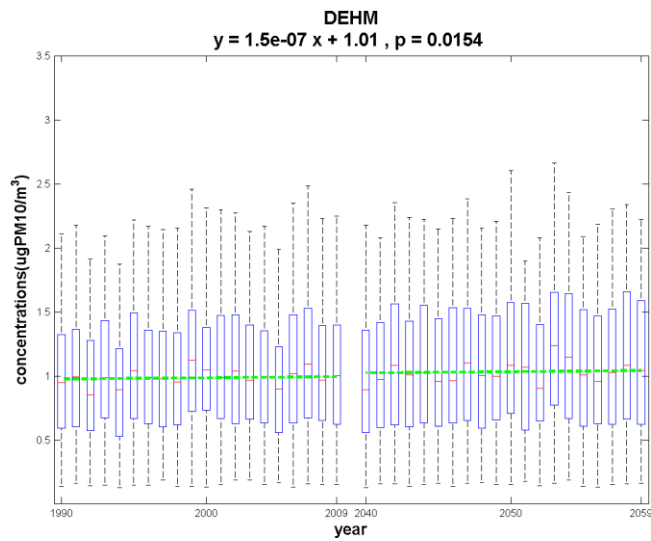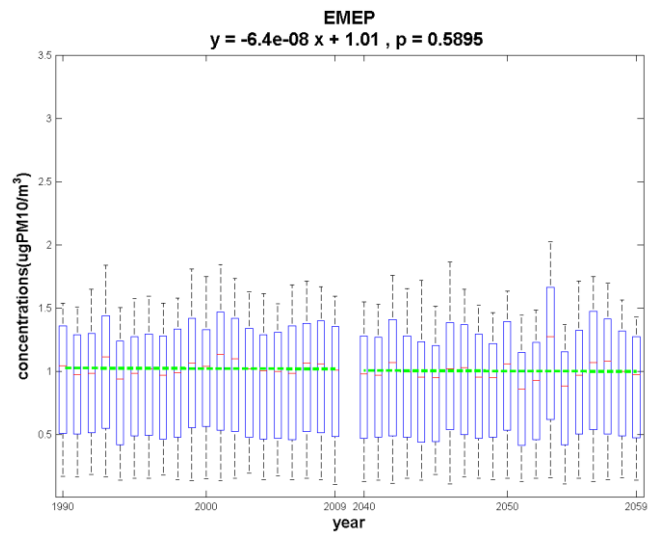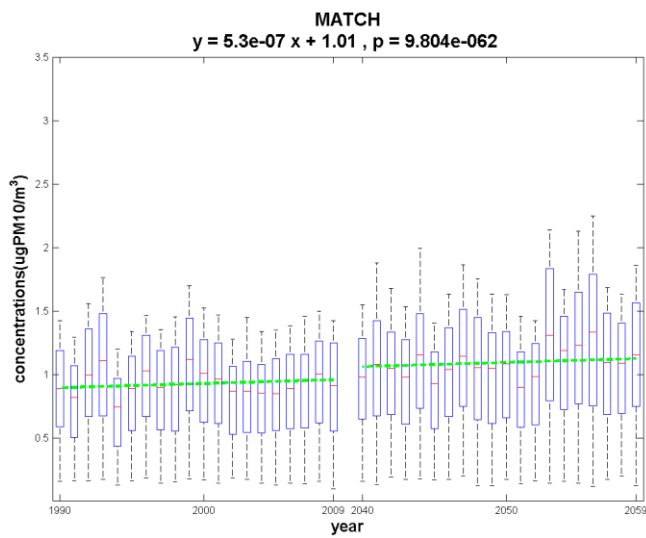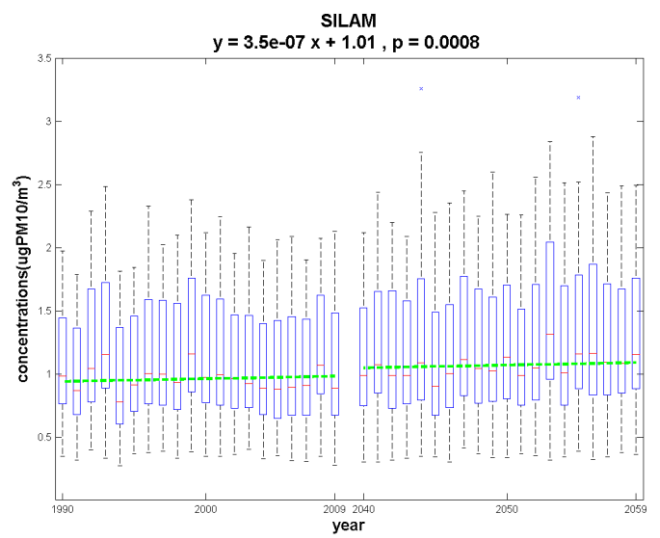

1

2 **Figure S10** Black Sea SSA mean concentration ( $\mu\text{gPM}_{10} \text{m}^{-3}$ ) normalized trend (y) over the  
 3 past and future periods (x [year]).

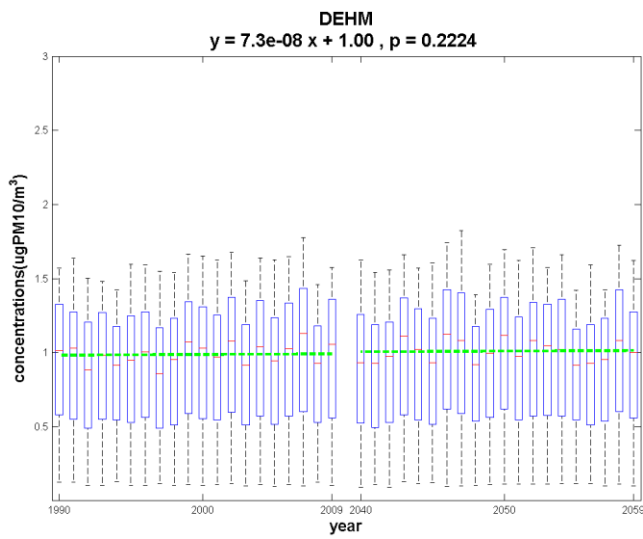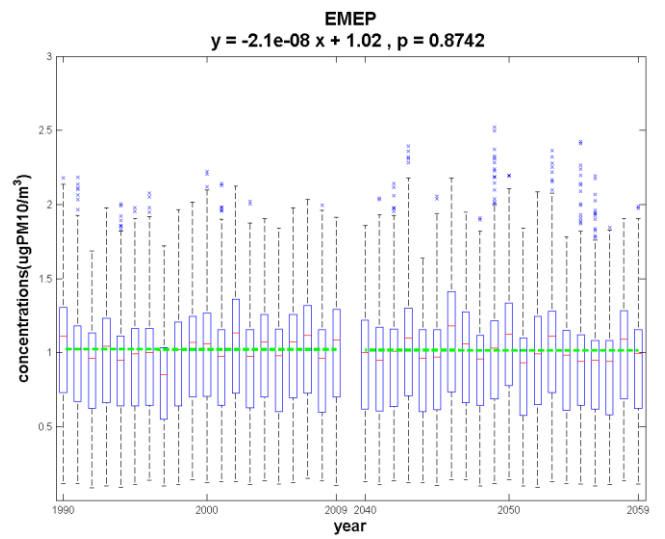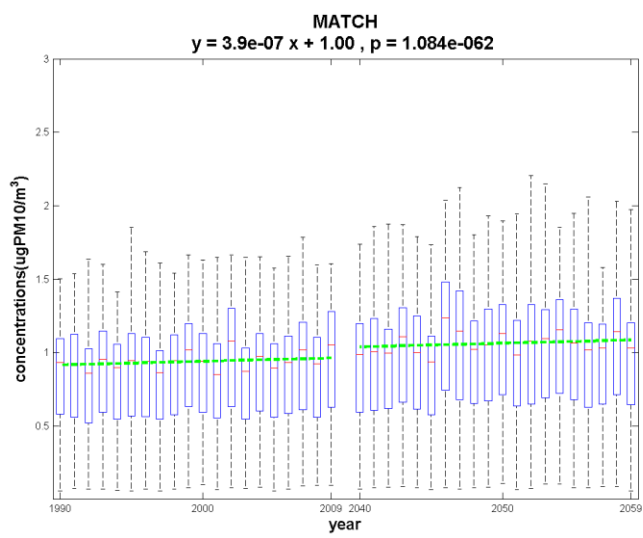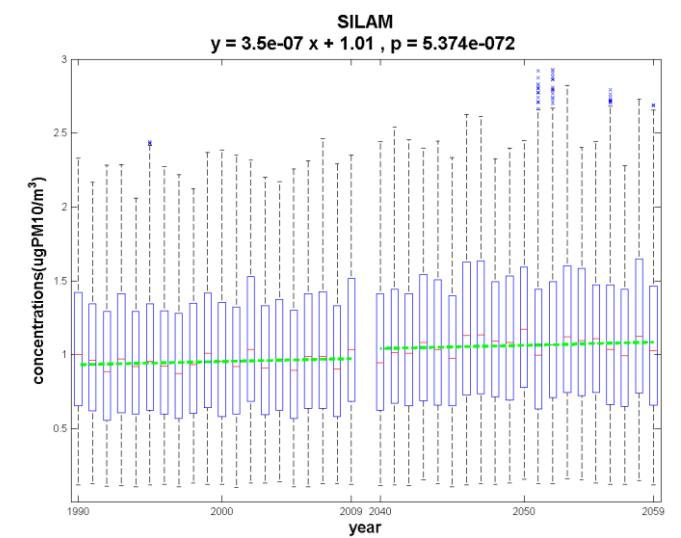

- 1
- 2 **Figure S11** Mediterranean Sea SSA mean concentration ( $\mu\text{gPM}_{10}/\text{m}^3$ ) normalized trend ( $y$ )
- 3 over the past and future periods ( $x$  [year]).

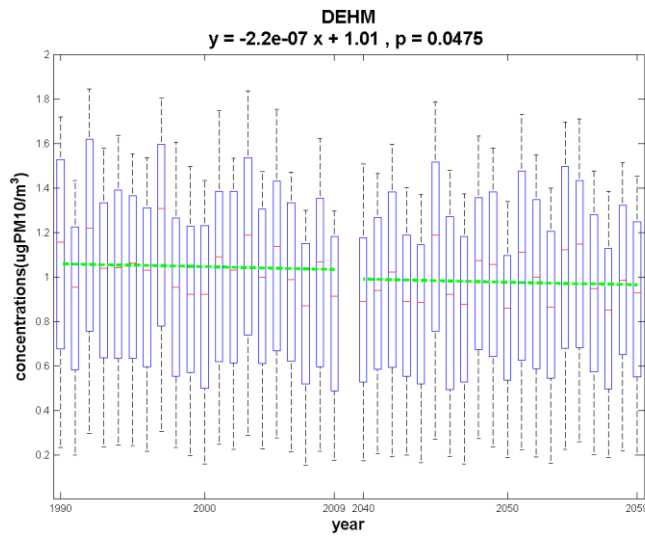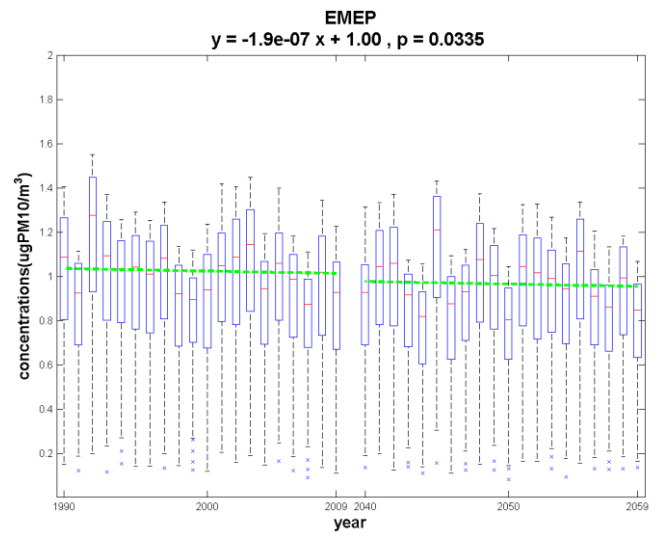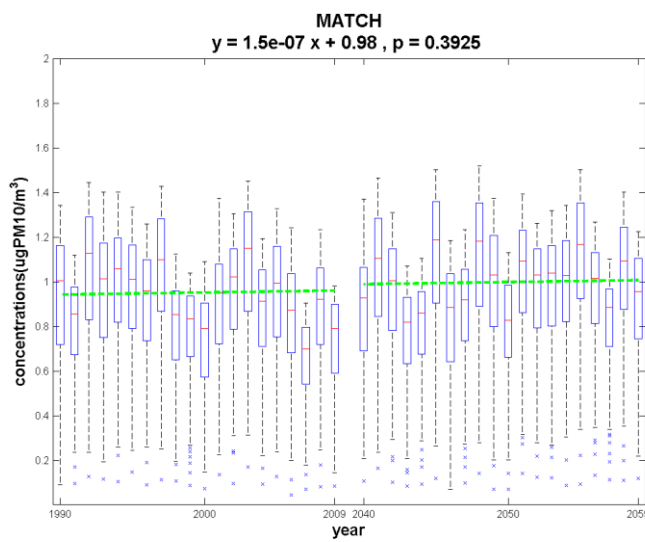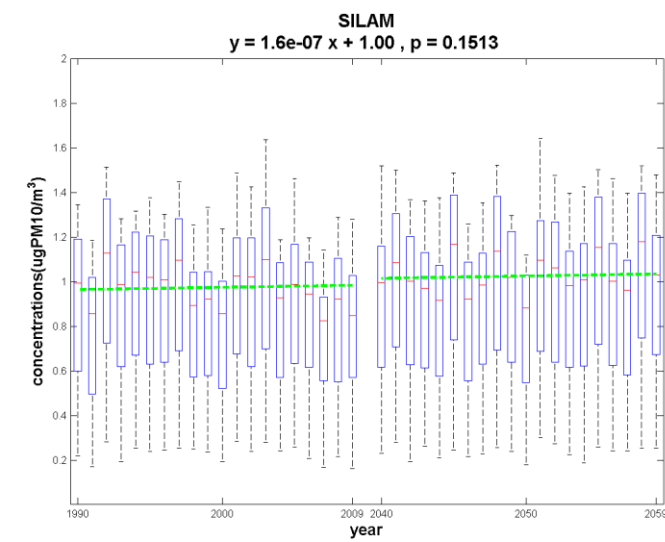

1

2 **Figure S12** North Sea SSA mean concentration ( $\mu\text{gPM}_{10} \text{ m}^{-3}$ ) normalized trend (y) over the  
 3 past and future periods (x [year]).

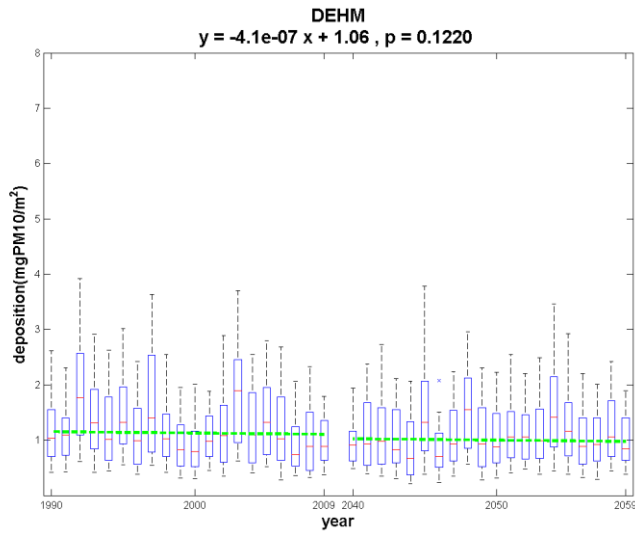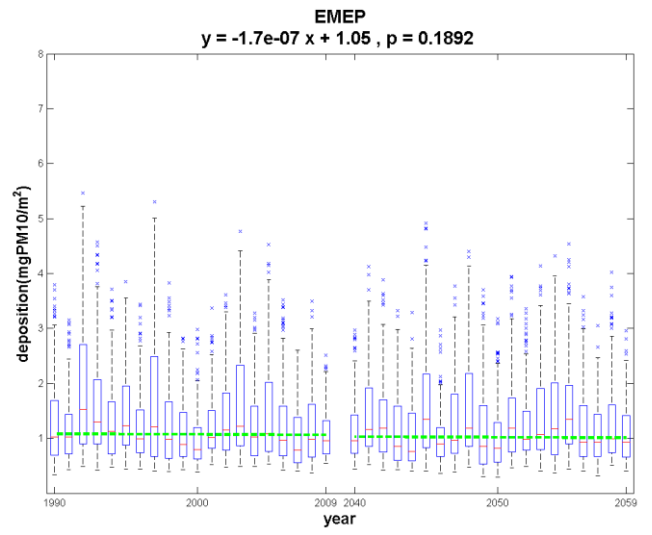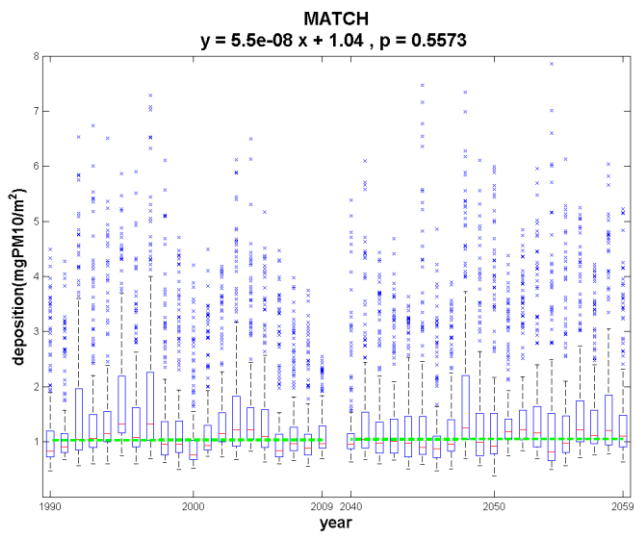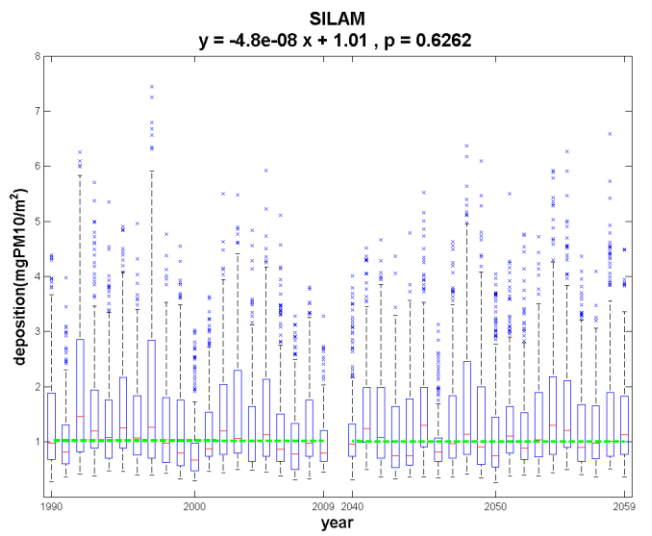

- 1
- 2
- 3
- 4
- 5
- 6

**Figure S13** Baltic Sea SSA annual deposition ( $\text{mgPM}_{10} \text{ m}^{-2}$ ) normalized trend ( $y$ ) over the past and future periods ( $x$  [year]).

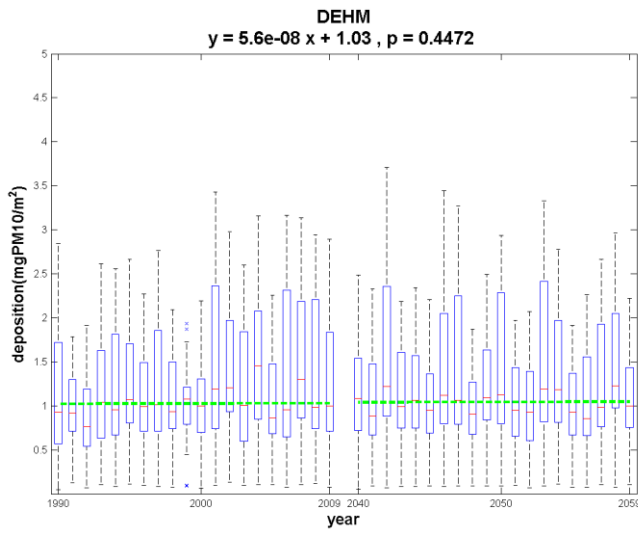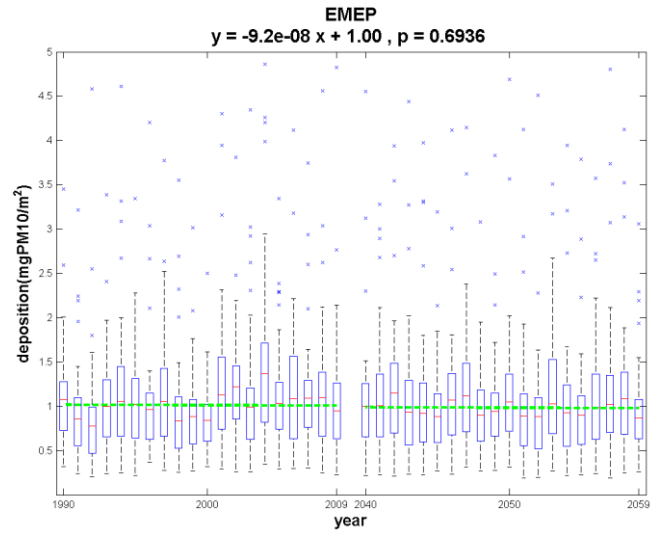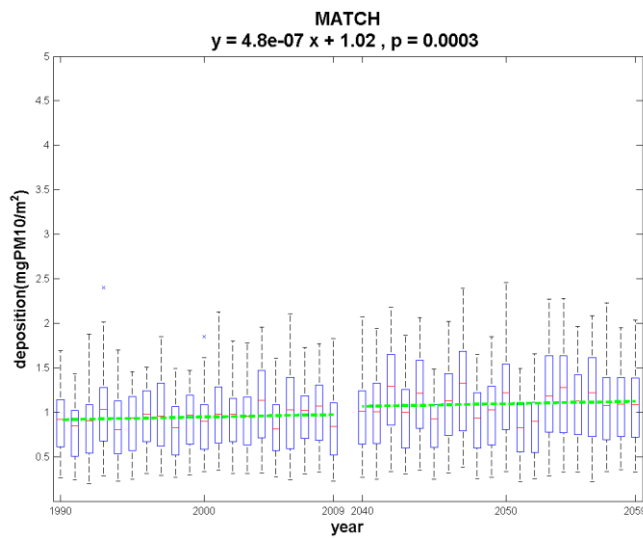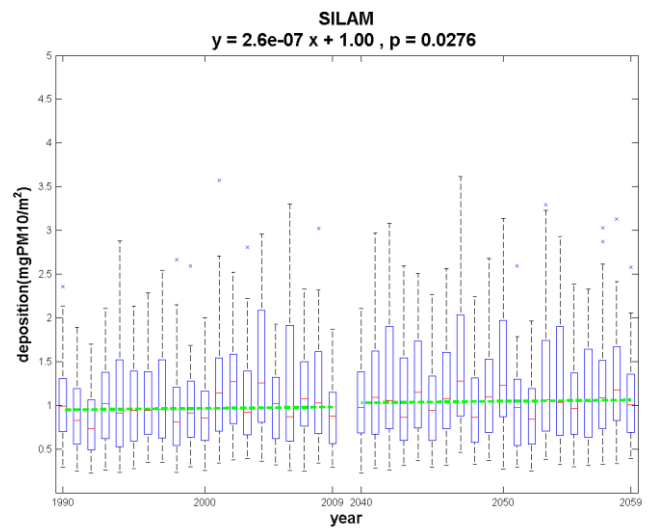

1

2 **Figure S14** Black Sea SSA annual deposition ( $\text{mgPM}_{10} \text{ m}^{-2}$ ) normalized trend ( $y$ ) over the  
 3 past and future periods ( $x$  [year]).

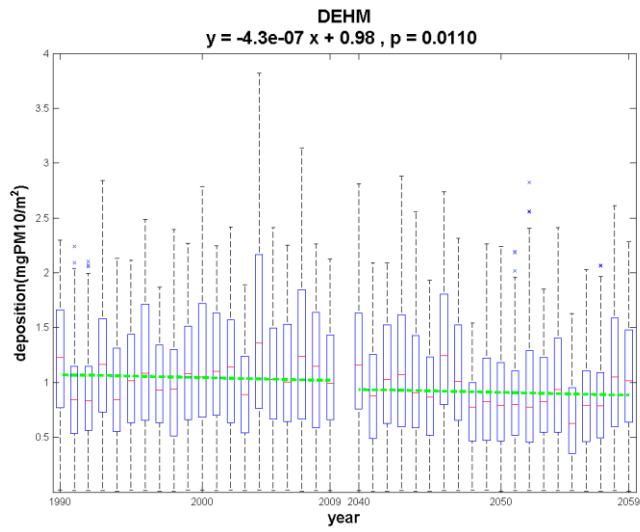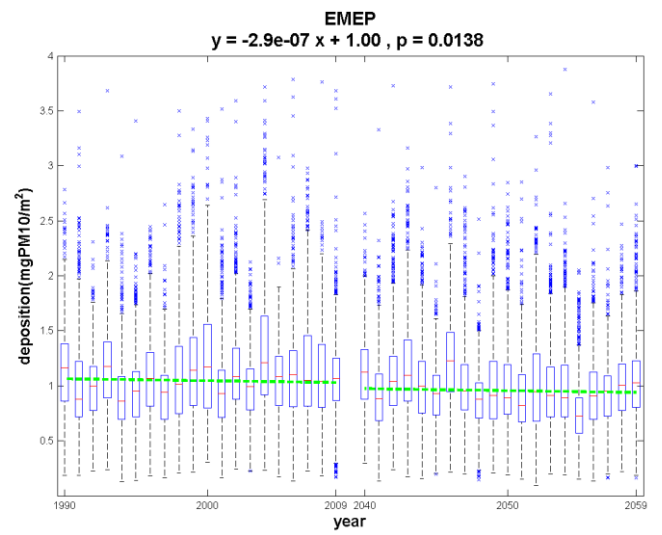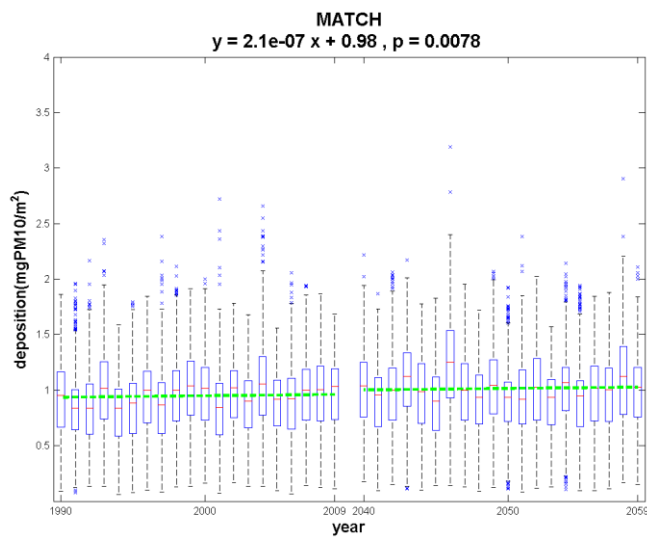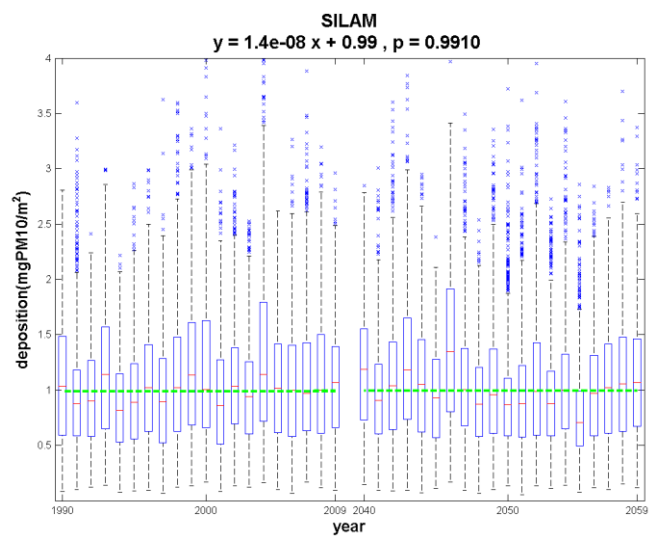

- 1 **Figure S15** Mediterranean Sea SSA annual deposition ( $\text{mgPM}_{10} \text{ m}^{-2}$ ) normalized trend ( $y$ )
- 2 over the past and future periods ( $x$  [year]).
- 3

1

2

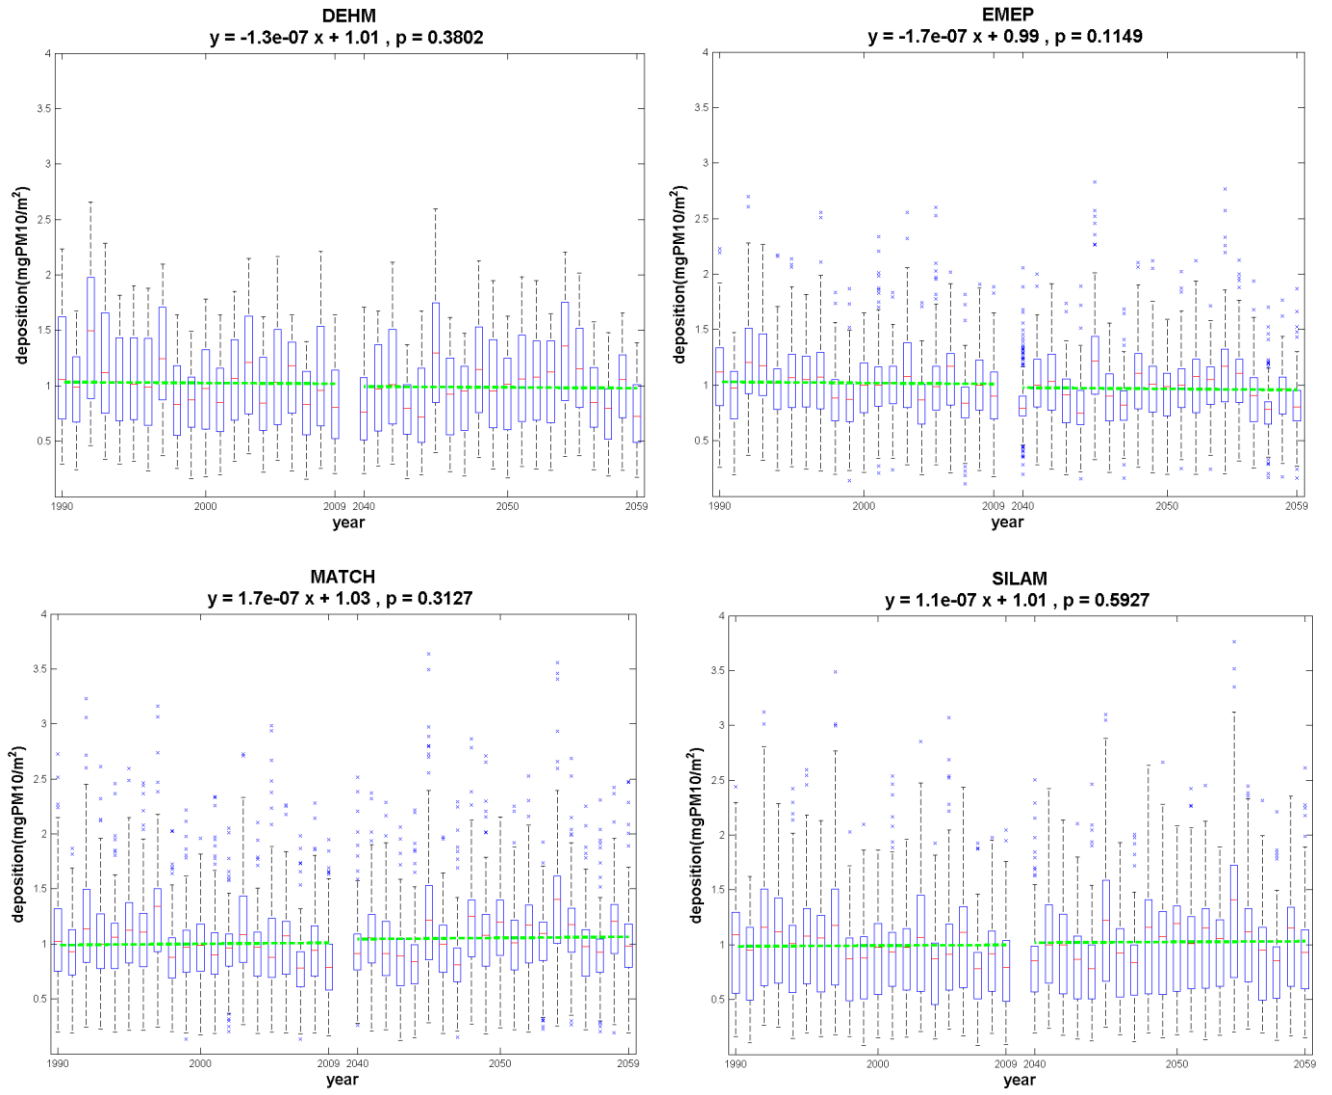

3

4 **Figure S16** North Sea SSA annual deposition ( $\text{mgPM}_{10} \text{ m}^{-2}$ ) normalized trend ( $y$ ) over the  
5 past and future periods ( $x$  [year]).

6

7
